# Supplementary material for: Physiology of deletion mutants in the anaerobic β-myrcene degradation pathway in Castellaniella defragrans
Source: PubMed Central journal article supplement (PMC3490891; doi:10.1186/1471-2180-12-192), 2012-09-04
Supplement: 1471-2180-12-192-S1.pdf [file 1471-2180-12-192-S1.pdf]

1 **BMC Microbiology 1536376629675241**

2 **Physiology of deletion mutants in the anaerobic  $\beta$ -myrcene**  
3 **degradation pathway in *Castellaniella defragrans***

4

5 **- Additional Material -**

6

7

8 Frauke Lüddeke

9 Email: [flueddeke@web.de](mailto:flueddeke@web.de)

10

11 Aytac Dikfidan

12 Email: [aytac.dikfidan@mpimf-heidelberg.mpg.de](mailto:aytac.dikfidan@mpimf-heidelberg.mpg.de)

13

14 Jens Harder\*

15 corresponding author, Email: [jharder@mpi-bremen.de](mailto:jharder@mpi-bremen.de)

16

17 Dep. of Microbiology, Max Planck Institute for Marine Microbiology, Celsiusstr. 1, 28359

18 Bremen, Germany

19

## 20 **Additional Material**

### 21 **Determination of antibiotic sensitivity and isolation of spontaneous antibiotic-resistant** 22 **strains of *C. defragrans* 65Phen.**

23 Endogenous antibiotic resistance strains of *C. defragrans* 65Phen was determined by growth  
24 on solid medium containing ampicillin (50 µg/mL), chloramphenicol (20 µg/mL), gentamycin  
25 (15µg/mL), kanamycin (50 µg/mL), neomycin (100 µg/mL), rifampicin (150 µg/mL),  
26 spectinomycin (100 µg/mL), streptomycin (50 µg/mL), and tetracycline (20 µg/mL). Stock  
27 solutions were prepared according to standard instructions [58]. After liquid cultures  
28 containing chloramphenicol (5 µg/mL), neomycin (25 µg/mL), rifampicin (150 µg/mL),  
29 spectinomycin (15 µg/mL) or tetracycline (20 µg/mL) showed growth of  
30 *C. defragrans* 65Phen, they were further incubated at antibiotic's work concentration and  
31 isolated on solid minimal medium. Dilution-to-extinction series of the wild type strain were  
32 used to inoculate solid minimal medium plates in presence or absence of the appropriate  
33 antibiotic under anoxic conditions for 4-5 days.

34 *C. defragrans* RIF2 was propagated without selection pressure in antibiotic-free medium for  
35 five passages with inocula of 10% (v/v). Afterwards plating on solid medium with and  
36 without rifampicin revealed that the resistance was preserved in 78% of the bacterial cells  
37 forming colonies.

38 **Additional Table 1 - Growth of *C. defragrans* strains 65Phen and RIF1 - RIF4.**

39 Optical density increase of cultures of *C. defragrans* strain 65Phen (in the absence of  
40 rifampicin) and four rifampicin-resistant mutants *C. defragrans* RIF 1-4 (in the presence of  
41 rifampicin) grown with 4 mM monoterpene and 10 mM nitrate. The inoculum size was 10%  
42 (v/v). Incubation took place for 28 d.

43

| Substrates      | Maximum OD <sub>660</sub> <i>C. defragrans</i> strains |       |       |       |       |
|-----------------|--------------------------------------------------------|-------|-------|-------|-------|
|                 | 65Phen                                                 | RIF 1 | RIF 2 | RIF 3 | RIF 4 |
| β-Myrcene       | 0.35                                                   | 0.48  | 0.48  | 0.39  | 0.42  |
| (+)-Limonene    | 0.68                                                   | 0.55  | 0.61  | 0.65  | 0.57  |
| (+)-α-Terpineol | 0.22                                                   | 0.19  | 0.14  | 0.16  | 0.21  |
| (+)-2-Carene    | 0.42                                                   | 0.24  | 0.28  | 0.30  | 0.28  |
| (+)-3-Carene    | 0.27                                                   | 0.24  | 0.34  | 0.28  | 0.27  |
| (-)-α-Pinene    | 0.38                                                   | 0.38  | 0.30  | 0.37  | 0.38  |
| (+)-Sabinene    | 0.40                                                   | 0.40  | 0.46  | 0.43  | 0.41  |

44

45 **Determination of the transconjugation frequency with *E. coli* S17-1 pBBR1-MCS2**

46 The donor strain, an overnight culture of *E. coli* S17-1 carrying pBBR1-MCS2, and the  
47 recipient *C. defragrans* RIF were grown to late exponential phase and were mixed in several  
48 ratios (1:1, 1:5, 1:10) in a total volume of 20 µL and spread as a single drop on minimal agar.  
49 After incubation for 3 h, 8 h or 24 h at 28 °C under oxic conditions the bacteria were  
50 resuspended in 1 mL liquid minimal medium. Dilution-to-extinction series were streaked out  
51 onto solid minimal medium supplemented with kanamycin and rifampicin and anaerobically  
52 incubated at 28 °C for four days. To determine the transconjugation frequency, donor and  
53 recipient strain were plated onto solid medium with and without antibiotics. Growth of *E. coli*  
54 S17-1 containing pBBR1MCS-2 was inhibited in the presence of rifampicin as well as growth  
55 of *C. defragrans* RIF in the presence of kanamycin. But transconjugants *C. defragrans* RIF  
56 carrying pBBR1MCS-2 grew in the presence of rifampicin and kanamycin. The appearance of  
57 pBBR1MCS-2 in transconjugants was confirmed by PCR as well as plasmid DNA isolation  
58 and analysis of restriction digests. Optimal conjugation conditions were observed at donor-to-  
59 recipient ratios of at least one-to-one and a mating time of 8 h (Additional Table 2).

60

61 **Additional Table 2 - Conjugation frequencies (FC).**

62 Conjugation frequency (FC) of plasmid transfer of pBBR1MCS-2 from *E. coli* S17-1 into  
 63 *C. defragrans* RIF. Frequencies are given as tranconjugants cells /donor cells for experiments  
 64 with  $5.6 \times 10^8$  donor cells. The standard variation was always below 15 %.

65

| Recipient:<br>ratio | donor | 3 h mating                  |                       | 8 h mating                  |                       |
|---------------------|-------|-----------------------------|-----------------------|-----------------------------|-----------------------|
|                     |       | Transconjugants<br>[CFU/mL] | FC                    | Transconjugants<br>[CFU/mL] | FC                    |
|                     | 1:1   | $3.22 \times 10^3$          | $5.76 \times 10^{-6}$ | $6.36 \times 10^4$          | $1.14 \times 10^{-4}$ |
|                     | 1:5   | $1.83 \times 10^3$          | $3.26 \times 10^{-6}$ | $9.92 \times 10^4$          | $1.77 \times 10^{-4}$ |
|                     | 1:10  | $3.24 \times 10^3$          | $5.78 \times 10^{-6}$ | $9.65 \times 10^4$          | $1.72 \times 10^{-4}$ |

66

67 **Assessment of plasmid stability under non-selective conditions.**

68 The stable maintenance of plasmid pBBR1MCS-2 in *C. defragrans* 65Phen was assayed by  
 69 anaerobic growth of transconjugants in denitrifying liquid medium with  $\alpha$ -phellandrene as  
 70 substrate without any selection pressure. The cultures were transferred five times in non-  
 71 selective media (for 48 generations) and the colony-forming units (CFU)/mL were determined  
 72 by plating appropriate dilution series in the presence or absence of kanamycin revealing a  
 73 resistance in over 99% of the colonies. This demonstrated the stable maintenance of  
 74 pBBR1MCS-2 in *C. defragrans* RIF.

75

76 **Additional Figure 1 - Physical and genetic map of the mobilizable suicide vector**  
 77 **pK19mobsacBΔgeoA.**

78 Physical and genetic map of the mobilizable suicide vector pK19mobsacBΔgeoA. The  
 79 narrow-host range vector lacks the capability of autonomous replication in  
 80 *Betaproteobacteria* [58] and features selection marker genes encoding for kanamycin  
 81 resistance (Km<sup>R</sup>) and for sucrose sensitivity (*sacB*) are indicated in black. Genes encoding for  
 82 the 5' and 3' flanking regions of the *geoA* are indicated in grey (ORF29, ORF30, ORF32).  
 83 OriT = origin of transfer replication. Restrictions sites used for cloning are marked.

84  
 85

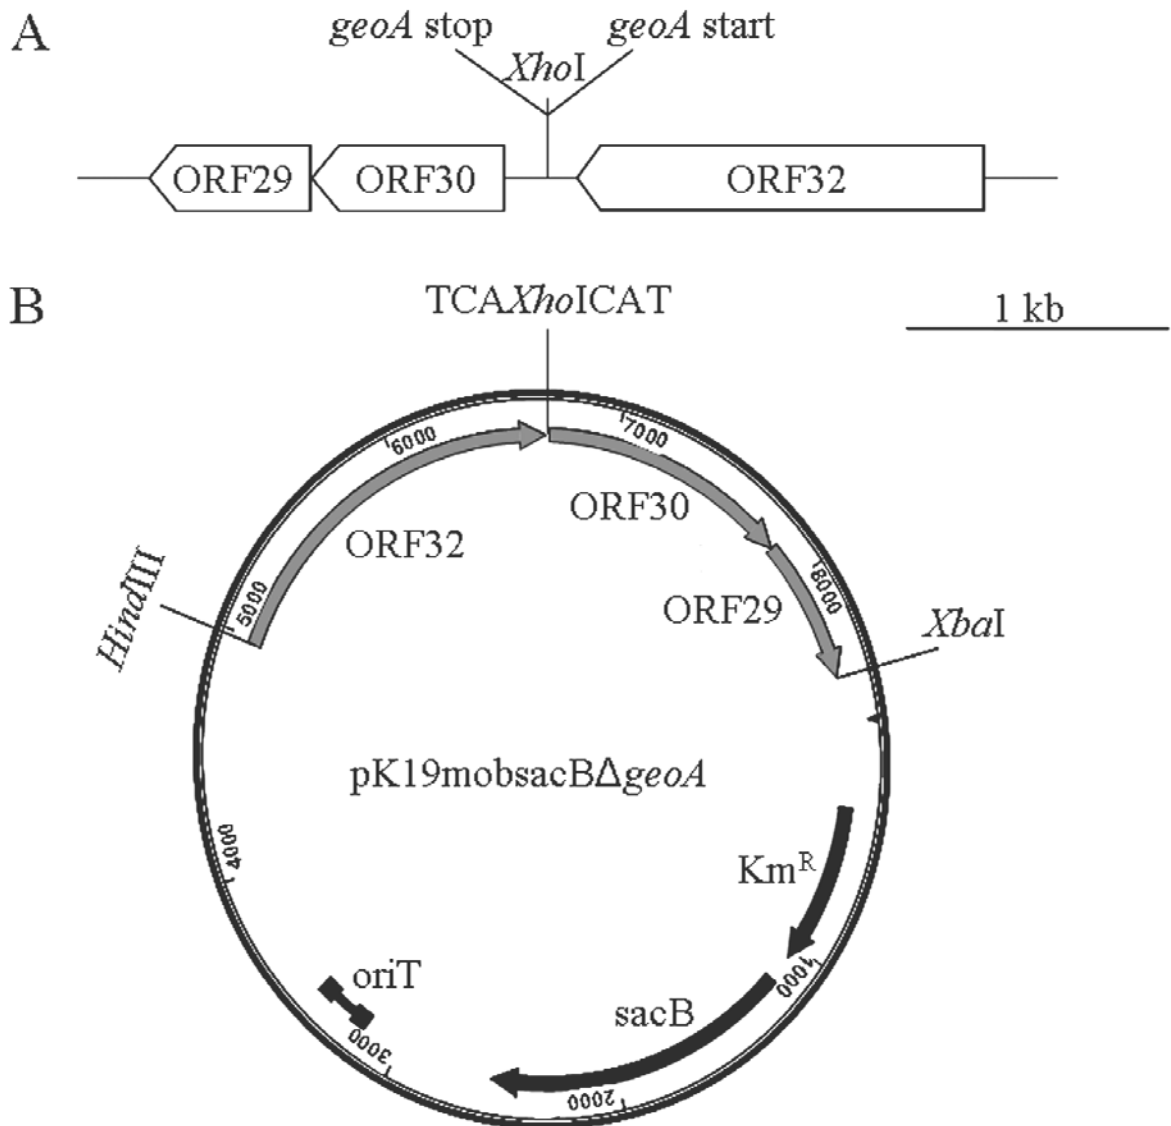

86

87 **Additional Figure 2 - Genetic map of contig FR6694457.2**

88 An annotation of open reading frames, including ORF 18 (*geoB*, geranial dehydrogenase),  
 89 ORF 26 (*Idi*, linalool dehydratase isomerase) and ORF 31 (*geoA*, geraniol dehydrogenase).  
 90 P indicates potential promoter regions, S Shine-Dalgarno sequences and T termination  
 91 structures.  
 92

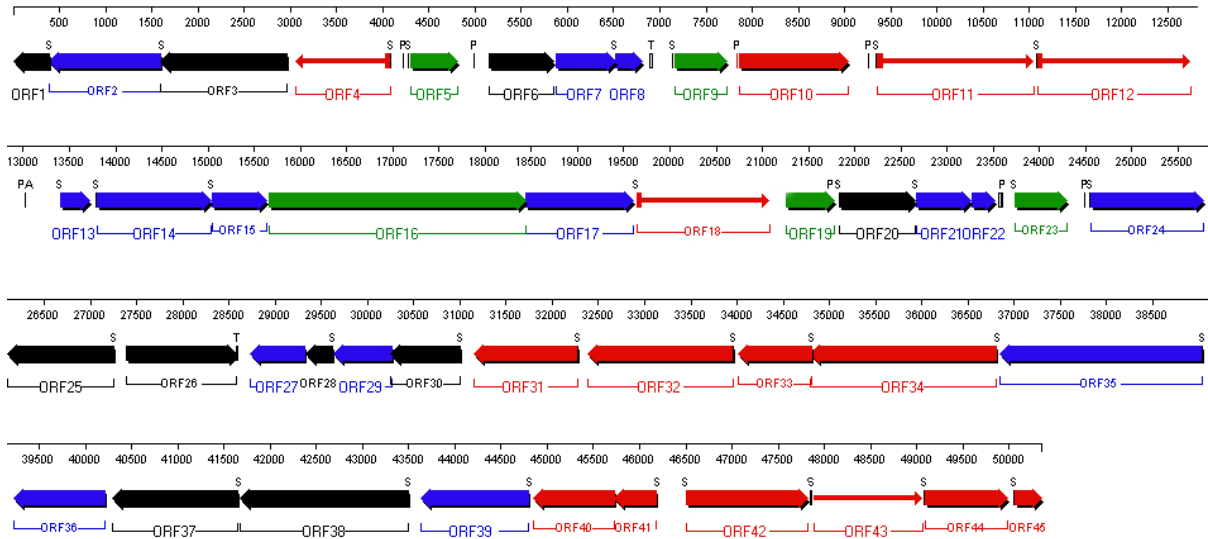

93

94

95 **Additional Figure 3 - Genetic characterization of *C. defragrans*  $\Delta ldi$  and *C. defragrans***  
96  **$\Delta geoA$ .**

97 Electropherogram of PCR products obtained with genomic DNA from *C. defragrans* strains  
98 65Phen,  $\Delta ldi$ ,  $\Delta ldi$ comp,  $\Delta geoA$  and  $\Delta geoA$ comp. The *ldi* deletion was confirmed with the  
99 primer pair ORF25\_401\_F & ORF27\_2005\_R that yielded in the case of the wild type a 2463  
100 bp amplicon, and in the case of the *ldi*-deletion a 1269bp amplicon. The *geoA* deletion was  
101 detected with the primer pair ORF30\_30967\_F & ORF32\_32822\_R; the wild type yielded a  
102 1904 bp amplicon, while the amplicon of *C. defragrans*  $\Delta geoA$  is shortened to 740 bp. M =  
103 GeneRuler™ 100 bp Plus DNA Ladder (Fermentas).

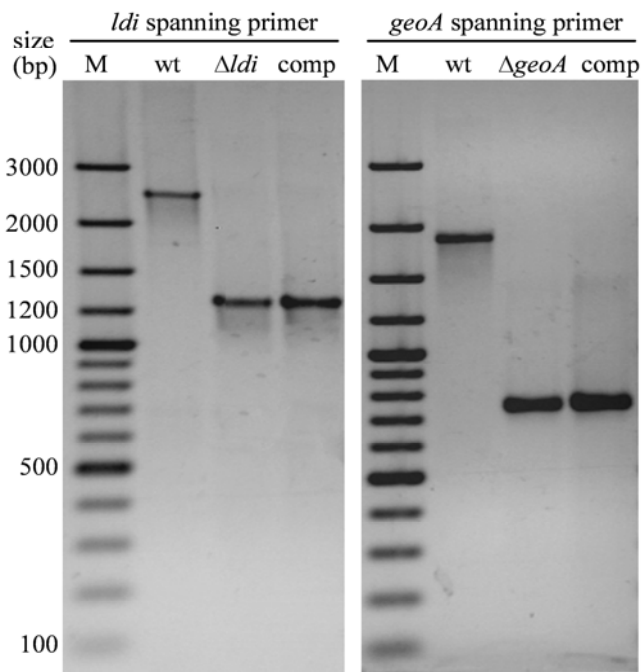

104

105

106 **Additional Figure 4 - Transcriptional characterization of *C. defragrans*  $\Delta ldi$  and *C.***  
 107 ***defragrans*  $\Delta geoA$ .**

108 As template for transcriptional analyses served cDNA obtained with gene-specific primers.  
 109 RT-PCR was performed with primers annealing on A) *ldi*, B) ORF25 and ORF27, C) *geoA*,  
 110 and D) ORF30 and ORF32. The transcriptional analysis revealed presence of the genes in the  
 111 wild type and the complemented mutant, but their absence in the prevailing deletion mutant  
 112 *C. defragrans*  $\Delta ldi$  or *C. defragrans*  $\Delta geoA$  (A, C). The expression of 5'- and 3'-flanking  
 113 regions of the *ldi* (B).or *geoA* (D) was similar to that of the wild type. All negative controls,  
 114 including a RT-PCR without reverse transcriptase, did not show the formation of amplicons  
 115 (data not shown). M = GeneRuler™ 100 bp Plus DNA Ladder (Fermentas).

116

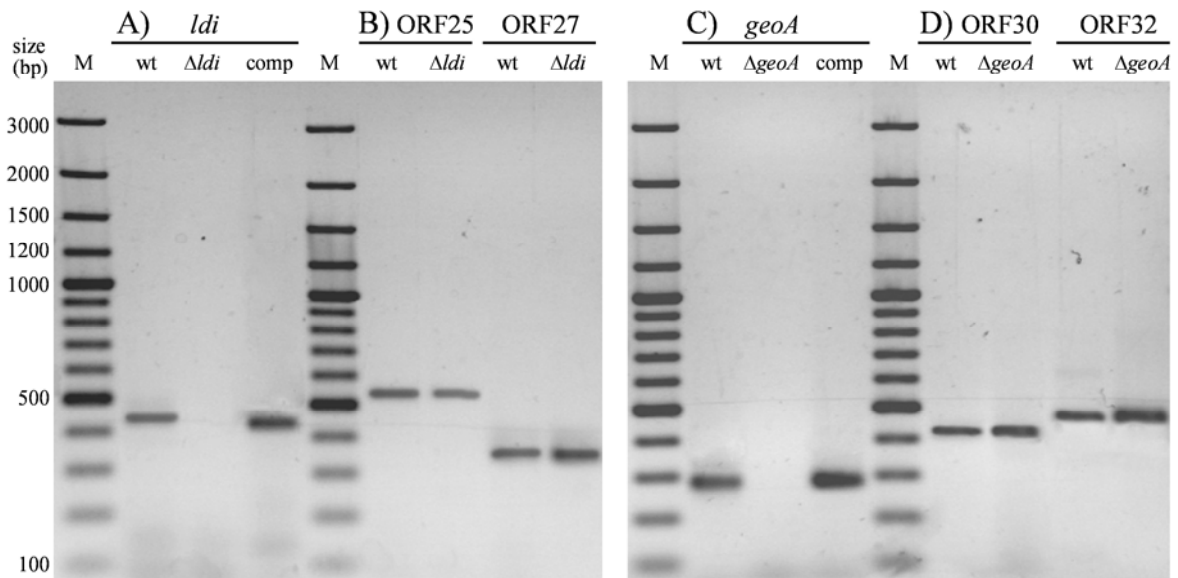

117

118

119
